# Supplementary material for: The Prediction of Type 1 Diabetes by Multiple Autoantibody Levels and Their Incorporation Into an Autoantibody Risk Score in Relatives of Type 1 Diabetic Patients
Source: Oxford University Press journal article supplement (doi:10.2337/dc13-0425), 2013-07-02
Supplement: dc130425supplementarydata.pdf [file dc130425supplementarydata.pdf]

## SUPPLEMENTARY DATA

### **Type 1 Diabetes TrialNet Study Group**

Steering Committee: Jay S. Skyler (University of Miami Diabetes Research Institute), Chairman; Mark Anderson (University of California San Francisco), Katarzyna Bourcier (NIAID), Dorothy Becker (University of Pittsburgh), Penelope Bingley (University of Bristol), Janice Blum (Indiana University), Emanuele Bosi (San Raffaele Hospital), Jane Buckner (Benaroya Research Institute), H. Peter Chase (University of Colorado Barbara Davis Center for Childhood Diabetes), Michael Clare-Salzler (University of Florida), Peter Colman (Walter and Eliza Hall Institute of Medical Research), Linda DiMeglio (Indiana University), George S. Eisenbarth (University of Colorado Barbara Davis Center for Childhood Diabetes), C. Garrison Fathman (Stanford University), Stephen Gitelman (University of California San Francisco), Robin Goland (Columbia University), Peter Gottlieb (University of Colorado Barbara Davis Center for Childhood Diabetes), Gilman Grave (NICHD), Carla Greenbaum (Benaroya Research Institute), Leonard Harrison (Walter and Eliza Hall Institute of Medical Research), Kevan Herold (Yale University), Richard Insel (Juvenile Diabetes Research Foundation), Jeffrey P. Krischer (University of South Florida), Jeffrey Mahon (University of Western Ontario), Jennifer Marks (University of Miami Diabetes Research Institute), Antoinette Moran (University of Minnesota), Jerry P. Palmer (University of Washington), Mark Peakman (Guy's, King's, and St. Thomas' School of Medicine), Alberto Pugliese (University of Miami Diabetes Research Institute), Philip Raskin (University of Texas Southwestern Medical School), Maria Grazia Roncarolo (San Raffaele Scientific Institute), William Russell (Vanderbilt University), Peter Savage (NIDDK), Desmond Schatz (University of Florida), Robert Sherwin (Yale University), Mark Siegelman (University of Texas Southwestern Medical School), Olli Simell (Hospital District of Southwest Finland), James Thomas (Vanderbilt University), Massimo Trucco (University of Pittsburgh), John Wagner (University of Minnesota), Diane Wherrett (University of Toronto), Darrell M. Wilson (Stanford University), William Winter (University of Florida), Judith Fradkin (NIDDK, ex-officio), Ellen Leschek (NIDDK, ex-officio), Lisa Spain (NIDDK, ex-officio).

Past Members: Christophe Benoist (Joslin Diabetes Center), Jeffrey Bluestone (University of California San Francisco), David Brown (University of Minnesota), Catherine Cowie (NIDDK), Bernard Hering (University of Minnesota), Stanley Jordan (Cedars-Sinai Medical Center), Francine R. Kaufman (Childrens Hospital Los Angeles), John M. Lachin (George Washington University), Kirsti Nanto-Salonen (Hospital District of Southwest Finland), Gerald Nepom (Benaroya Research Institute), Tihamer Orban (Joslin Diabetes Center), Robertson Parkman (Childrens Hospital Los Angeles), Mark Pescovitz† (Indiana University), John Peyman (NIAID), John Ridge (NIAID), Henry Rodriguez (Indiana University), Anette Ziegler (Institut für Diabetesforschung).

Executive Committee: Jay S. Skyler, Katarzyna Bourcier, Carla J. Greenbaum, Jeffrey P. Krischer, Ellen Leschek, Lisa Rafkin (University of Miami Diabetes Research Institute), Peter Savage, Lisa Spain.

Past Members: Catherine Cowie, Mary Foulkes (George Washington University), Heidi Krause-Steinrauf (George Washington University), John M. Lachin, Saul Malozowski (NIDDK), John Peyman, John Ridge, Stephanie J. Zafonte (George Washington University).

Chairman's Office: Jay S. Skyler, Carla J. Greenbaum, Norma S. Kenyon, Lisa Rafkin, Irene Santiago, Jay M. Sosenko

TrialNet Coordinating Center (University of South Florida): Jeffrey P. Krischer, Brian Bundy, AQesha Luvon Ritzie, Michael Abbondandolo, Timothy Adams, Persida Alies, Franz Badias, Craig Beam, Matthew Boonstra, David Boulware, David Cuthbertson, Christopher Eberhard, Julie Ford, Jinin Ginem,

## SUPPLEMENTARY DATA

Heather Guillette, Brian Hays, Martha Henry, Pat Law, Cristin Linton, Shu Liu, Jennifer Lloyd, Sarah Muller, Ryan O'Donnell, Yazandra Parrimon, Kate Paulus, Jennifer Pilger, Joy Ramiro, Amy Roberts, Kelly Sadler, Amanda Terry, Margaret Wootten, Ping Xu, Kenneth Young

Past Staff Members: Monica Bassi, Doug Freeman, Moriah Granger, Michelle Kieffer, Lavanya Nallamshetty, Audrey Shor

Previous Coordinating Center (George Washington University) (who were involved with study at time of initiation): John M. Lachin, Mary Foulkes, Pamela Harding, Heidi Krause-Steinrauf, Susan McDonough, Paula F. McGee, Kimberly Owens Hess, Donna Phoebus, Scott Quinlan, Erica Raiden

NIDDK Staff: Judith Fradkin, Ellen Leschek, Peter Savage, Lisa Spain

Data Safety and Monitoring Board: Emily Blumberg (University of Pennsylvania), Chair; Jonathan Braun (University of California Los Angeles), Lori Laffel (Joslin Diabetes Center), Ali Naji (University of Pennsylvania), Jorn Nerup (University of Copenhagen), Trevor Orchard (University of Pittsburgh), Anastasios Tsiatis (North Carolina State University), Robert Veatch (Georgetown University), Dennis Wallace (Research Triangle Institute).

Past Members: Ake Lernmark (Lund University), Bernard Lo (University of California San Francisco), Herman Mitchell (Rho Inc.), Michael Steffes (University of Minnesota), Bernard Zinman (University of Toronto).

Infectious Disease Safety Committee: Brett Loechelt (Children's National Medical Center) (Medical Monitor), Lindsey Baden (Harvard University), Michael Green (University of Pittsburgh), Adriana Weinberg (University of Colorado)

Laboratory Directors: George S. Eisenbarth, Santica Marcovina (University of Washington), Jerry P. Palmer, Adriana Weinberg, William Winter, Liping Yu (University of Colorado Barbara Davis Center for Childhood Diabetes), Sunanda Babu (University of Colorado Barbara Davis Center for Childhood Diabetes)

Protocol Advisory Committee: Tihamer Orban (Chair), Peter Gottlieb, Carla Greenbaum, Heidi Krause-Steinrauf, John M. Lachin, Ellen Leschek, Brett Loechelt, Robertson Parkman, Lisa Rafkin, Alison Rigby, Jay S. Skyler, Lisa Spain, John Wagner.

North American Clinical Center Staff involved in this Protocol:

Benaroya Research Institute, Seattle, Washington: Carla Greenbaum, Jennifer Bollyky, Srinath Sanda, David Tridgell, Marli McCulloch-Olson, Heather Vendettuoli, Deborah Hefty, Mary Ramey, Christine Webber, Kristen Kuhns, Nicole Hilderman, Angela Dove, Marissa Hammond, Jani Klein, Emily Batts

Childrens Hospital Los Angeles: Roshanak Monzavi, Mary Halvorson, Meredith Bock, Lynda Fisher, Debra Jeandron, Jamie Wood, Francine R. Kaufman

Columbia University, New York: Robin Goland, Ellen Greenberg, Mary Pat Gallagher, Jeniece Trast, Mary Chan

## SUPPLEMENTARY DATA

Indiana University, Indianapolis: Henry Rodriguez, Mark Pescovitz, Linda DiMeglio, Lyla Christner, Maria Nicholson, Martha Mendez

Joslin Diabetes Center, Boston: Tihamer Orban, Christophe Benoist, Joseph Wolfsdorf, Alyne Ricker, Heyam Jalahej, Debbie Conboy, Klara Farkas, Janos Kis, Hui Zhang, Steve Fay

Stanford University, California: Darrell M. Wilson, Bruce A. Buckingham, Tandy Aye, Trudy Esrey, Adriana Soto, Jennifer Perry, Bonita Baker, Alison Rigby, Barbara Berry

University of California San Francisco: Stephen E. Gitelman, Stephen M. Rosenthal, Mark Anderson, Saleh Adi, Kathleen Breen, Celia Hamilton

University of Colorado Barbara Davis Center for Childhood Diabetes, Aurora, Colorado: Peter Gottlieb, H. Peter Chase, Aaron Michels, Whitney Kastelic, Laurie Weiner

University of Florida, Gainesville, FL: Desmond Schatz, Michael Haller, Michael Clare-Salzler, Roberta Cook, Diane Mancini, Annie Abraham, Elena Hicks, Gloria Cole

University of Miami Diabetes Research Institute, Miami, Florida: Jennifer B. Marks, Alberto Pugliese, Della Matheson, Carlos Blaschke, Luz Arazo, Mario Cisneros, Brenda Acosta

University of Minnesota, Minneapolis: Antoinette Moran, Brandon Nathan, John Wagner, Mary Ann Boes, Carrie Gibson, Lois Finney, Theresa Albright-Fischer, Jennifer Smith

University of Pittsburgh, Pennsylvania: Dorothy Becker, Frederico Toledo, Ingrid Libman, Karen Riley, Kelli Delallo, Kym Smith, Diane Gwynn, Gyna Wohlers

University of Texas Southwestern Medical School: Philip Raskin, Perrin White, Bryan Dickson, Soumya Adhikari, Mark Siegelman, Marilyn Alford, Nenita Torres, Tauri Harden, Lourdes Pruneda, Erica Cordova, Renee Davis, Stefani Fernandez, Jamie Arthur

University of Toronto: Diane Wherrett, Lesley A. Eisel, Brenda Ahenkorah, Natasha Razack, Mithula Sriskandarajah

Vanderbilt University: William E. Russell, James W. Thomas, Daniel J. Moore, Anne Brown, Margo Black, Eric Pittel, Faith Brendle

International Clinical Center Staff involved in this Protocol:

San Raffaele Hospital (Italy): Emanuele Bosi, Manuela Battaglia, Cristina Belloni, Eleonora Bianconi, Luca Falqui, Pauline Grogan, Carlo Lombardoni, Sabina Martinenghi Pauline Grogan

University of Bristol (United Kingdom): Penelope Bingley, Rachel Aitken, Harriet Castleden, Nicola Farthing, Claire Matthews, Jenny McGee, Carole Wheaton

Walter and Eliza Hall Institute of Medical Research (Australia): Leonard C. Harrison, Elena Andaloro, Candice Breen, Peter Colman, Spiros Furlanos, Shane Gellert, Felicity Healy, John Wentworth

## SUPPLEMENTARY DATA

Hospital District of Southwest Finland (Finland): Oilli G. Simell, Sanna Jokipuu, Tiina Kallio, Elina Mantymaki, Kirsti Nanto-Salonen, Tiina Niininen, Birgitta Nurmi, Minna Romo, Eeva Ruohonen, Maria Sarma, Tuula Simell, Sointu Suomenrinne, Maija Torma

**Diabetes Prevention Trial–Type 1 (DPT-1) Study Group:**The DPT-1 Steering Committee included: Jay S. Skyler, M.D. (University of Miami) (Chair), David Brown, M.D. (University of Minnesota), H. Peter Chase, M.D. (Barbara Davis Center for Childhood Diabetes, University of Colorado), Elaine Collier, M.D. (NIAID), Catherine Cowie, Ph.D. (NIDDK), George S. Eisenbarth, M.D. (Barbara Davis Center for Childhood Diabetes, University of Colorado), Judith Fradkin, M.D. (NIDDK), Gilman Grave, M.D. (NICHD), Carla Greenbaum, M.D. (Benaroya Research Institute, Seattle), Richard A. Jackson, M.D. (Joslin Diabetes Center), Francine R. Kaufman, M.D. (Childrens Hospital Los Angeles), Jeffrey P. Krischer, Ph.D. (University of South Florida), Jennifer B. Marks, M.D. (University of Miami), Jerry P. Palmer, M.D. (University of Washington), Alyne Ricker, M.D. (Children' Hospital, Boston), Desmond A. Schatz, M.D. (University of Florida), Darrell Wilson, M.D. (Stanford University), William E. Winter, M.D. (University of Florida), Joseph Wolfsdorf, M.D. (Children' Hospital, Boston), Adina Zeidler, M.D. (University of Southern California). Previous members were: Howard Dickler, M.D., Richard C. Eastman, M.D., Noel K. Maclaren, M.D., John I. Malone, M.D., and R. Paul Robertson, M.D.

The manuscript was prepared by a Writing And Review Committee consisting of Jay S. Skyler, M.D., Jeffrey P. Krischer, Ph.D., Joseph Wolfsdorf, M.D., Catherine Cowie, Ph.D., Jerry P. Palmer, M.D., Carla Greenbaum, M.D., David Cuthbertson (University of South Florida), Lisa E. Rafkin-Mervis, M.S. (University of Miami), H. Peter Chase, M.D., and Ellen Leschek, M.D. (NIDDK).

The DPT-1 Planning Committee included: Jerry P. Palmer, M.D. (Chair), H. Peter Chase, M.D., Catherine Cowie, Ph.D., Judith Fradkin, M.D., George S. Eisenbarth, M.D., Ph.D., Carla Greenbaum, M.D., Kevan Herold, M.D. (Columbia University), Francine R. Kaufman, M.D., Jeffrey P. Krischer, Ph.D., Jennifer B. Marks, M.D., Lisa E. Rafkin-Mervis, M.S., Desmond A. Schatz, M.D., Jay S. Skyler, M.D.

DPT-1 Trial Coordinators included: Beenu Aneju, R.N. (Stanford University), Debbie Conboy, R.N. (Joslin Diabetes Center), Roberta Cook, R.N. (University of Florida), Mary Alice Dennis, R.N. (University of Florida), Lois Finney, R.D. (University of Minnesota), Sherrie Harris, R.N. (Barbara Davis Center for Childhood Diabetes, University of Colorado), Della Matheson, R.N. (University of Miami), Marli McCulloch-Olsen (Benaroya Research Institute, Seattle), Terry Smith, R.N. (Joslin Diabetes Center), Julie Valenzuela, R.N. (Childrens Hospital Los Angeles), Noemi Vega, R.N. (University of Southern California).

The DPT-1 Data Safety and Quality Monitoring Committee included: Oscar B. Crofford, M.D. (Melbourne, Arkansas), David DeMets, Ph.D. (University of Wisconsin), John M. Lachin, Ph.D. (George Washington University), Jørn Nerup, M.D. (University of Copenhagen), Aldo Rossini, M.D. (University of Massachusetts), Alicia Schiffrin, M.D. (McGill University), Michael Steffes, M.D. (University of Minnesota), Anastasios Tsiatis, Ph.D. (North Carolina State University), Bernard Zinman, M.D. (University of Toronto).

**Affiliates:** Akron, OH: A. Haider, J. Haas, Albany, NY: R. Busch, K. Marshlok, N. Toleno, Albuquerque, NM: D. Schade, P. Katz, D. Hornbeck; Alexandria, LA: S. Foster, W. E. Roberts, M. Vercher; Ann Arbor, MI: C. Foster, C. Bower; Atlanta, GA: I. L. Hansen, D. Burcell, S. Anderson, R. Shultz, C. Sparks; Austin, TX: J. Wray, L. Goldman, R. M. Holt; Baltimore, MD: D. Counts, D.

## SUPPLEMENTARY DATA

Ostrowski, L. Plotnick, P. Fechner, C. Donnelly; Baton Rouge, LA: P. Bourgeois, LA: P. R. Prosser, B. Bowden; Billings, MT: F. Gunville, C. McClave, P. Heldt; Birmingham, AL: F. Ovalle, J. A. Atchison, P. Trull, A. Bottomlee; Bismarck, ND: S. Betting, T. Davis, J. Wetzstein; Boise, ID: C. Clinkingbeard, J. Davis, T. S. Roosevelt; Bronx, NY: H. Shamoon, H. Duffy; Brooklyn, NY: H. Anhalt, L. Brussard, M., J. V. Capotorto, P. Sheehan, S. A. Quyyumi, N. D. Cohen, B. Recker, S. Castells, W. Bastian, T. W. AvRuskin, V. Verdia; Buffalo, NY: T. Quattrin, K. Dwigun; Burlington, VT: W. Cefalu, N. Clark, L. Tilton; Calgary, Alberta: B. Corenblum, S. Harries, A. Whitty; Camp Hill, PA: R. McInroy, S. Smith; Charleston, SC: S. M. Willi, L. A. Key, Jr., D. S. O'Rear, S. M. Willi, D. S. O'Rear; Charleston, WV: S. R. Grubb, K. Taylor, P. Adams; Chattanooga, TN: M. Reeves, P. Reeves, R. Marshall, E. Tessmann; Chicago Heights, IL: A. Dwarakanathan, C. Beebe, I. Weintraub-Yohay, P O'Donnell; Chicago, IL: B. Rich, J. Imperial, B. Silverman, D. Edidin, S. Goodman, I. Brodsky, L. Brodsky; Cincinnati, OH: D. Klein, L. Dolan, D. Standiford; Cleveland, OH: D. Rogers, C. Switzer; Columbia, MO: D. E. Goldstein, D. Eichelberger, A. Smith; Columbus, OH: C. Ganong, J. GermAK: W. B. Zipf, M. Dyas, J. F. Sotos, C. Young; Corpus Christi, TX: W. Riley, S. Salai; Dallas, TX: P. Raskin, J. Marks, M. Alford, R. Sachson, C. Lebowitz; Des Moines, IA: J. Cook, J. Stedman, D. Indra; Detroit, MI: J. Gutai, B. Vinuya, M. McGraw-Maly; Duarte, CA: W. Feng, C. Williams, C. M. Krygsman, M. Pierce; Durham, NC: M. Freemark, J. Litton; Edmonton, Alberta: E. A. Ryan, K. Todd; El Paso, TX: D. Aboud, M. Pacillas; Erie, PA: J. H. Hines, A. F. Walczak, L. F. Aparicio, D. Harbaugh; Fairbanks, AK: M. Bergeson, M. Rozell; Fairfield, AL: E. Mahan; Folcroft, PA: H. Brooks; Fresno, CA: P. Ginier, P. Hensley; Glen Ellyn, IL: M. Heymann, B. Johnson, J. Tack; Grand Forks, ND: L. Sondrol, T. Hjelle; Grand Rapids, MI: D. Perry, J. Albert, L. Flory; Great Falls, MT: N. C. Gerrity, C. Naab, J. Heck; Greenville, SC: S. Weber, P. Mulhall; Gulfport, MS: B. G. Lansden; Halifax, Nova Scotia: E. Cummings, S. Salisbury, C. A. Armour; Hartford, CT: S. Ratzan, M. Trahiotis; Hollywood, FL: R. Nemery, H. Carney, D. Shorkey; Honolulu, HI: D. Fitz-Patrick, A. M. Y. Taniguchi; Houston, TX: S. Gunn, K. Copeland, S. McGirk; Idaho Falls, ID: J. Liljenquist, C. Fielding, S. Richards, V. Best; Indianapolis, IN: H. Rodriguez, G. Freidenberg, L. Amstutz, C. Weir; Iowa City, IA: E. Tsalikian, R. Hoffman, M. Bayless; Kalamazoo, MI: J. D. Hare, K. Hare; Kansas City, KS: J. L. Kyner, G. Eaks; Kansas City, MO: C. P. Howard, W. Moore, B. Woodford, T. Salyer; Kennewick, WA: N. Wannarachue, R. Meridith, D. Squires; Kiel, WI: D. Deubler; Kingsville, TX: H. Bruschetta; Knoxville, TN: D. A. Nickels, C. Dothard, A. Courtney; Laguna Hills, CA: A. O. Marcus; Lebanon, NH: P., J. Beisswenger, S. Kairys, W. Boyle, A. S. Christiano, R. O'Dell, A. Touchette; Lexington, KY: K. M. Thraillkill, D. Karounos, S. Webb, L. Moore, P. Allweiss, F. Anderson; London, Ontario: J. L. Mahon, J. McCallum; Los Angeles, CA: L. Raffel, J. Rotter, A. Verne, M. B. Davidson, G. Keppler; Madera, CA: S. Banerjee, M. Simon; Madison, WI: M. J. MacDonald, S. Mokrohisky; Manhasset, NY: P. W. Speiser, P. Fort, J. Corrigan; Marquette, MI: S. Pelkola; Memphis, TN: A. E. Kitabchi, M. Murphy, H. Lambeth, G. Burghen, P. McGlendon, J. Bondani, P. LeNoye; Milwaukee, WI: R. Alemzadeh, M. Koppen; Mineola, NY: J. A. Canas, M. Lamerson; Minneapolis, MN: M. Spencer, D. Etwiler, K. Reynolds; Missoula, MT: N. Eyler, P. Allen; Mobile, AL: B. A. Warner, K. R. Rettig, K. L. Levens, M. R. Davis; Montreal, Quebec: C. Polychronakos, D. Laforte; Naperville, IL: W. P. Zeller, J. McKernan, S. Finn; Nashville, TN: A. Powers, J. Lipps; New Albany, IN: S. Raghavan, V. Broadstone, P. Raake, K. Weissberg; New Haven, CT: W. V. Tamborlane, P. Gatcomb; New Orleans, LA: L. Blonde, T. Zimmerman, R. Zimmerman, C. Liebel, S. Chalew, A. Vargas, J. Rao, J. Ascani, T. Compton; New York, NY: B. Cerame, M. D. Harbison, Ron Newfield, MD, M. New, M. Wajnrajch, I. Vargas, K. Herold, H. Schachner, G. Feberes, N. K. Maclaren, D. Golub, R. Rappaport, R. McEvoy, N. Thomas, X. Pi-Sunyer, R. Saltiel-Berzin; Newark, NJ: R. Rappaport, J. Koblish; Oklahoma City, OK: P. Blackett, C. Comp, J. Beck; Omaha, NE: J. Hassing, L. Hahn, J. T. Lane, K. Corley, L. Larson; Orange, CA: R. Fiallo-Sharer, P. Lee, A. Cortez, N. Varni, H. Speer; Orlando, FL: S. Crockett, W. McDaniel, V. Roberts; Philadelphia, PA: S. A. Weinzimer, P. Cohen, L. Baker, D. De Paul, E. Rebecca;

## SUPPLEMENTARY DATA

Phoenix, AZ: R. Dolinar, M. B. Block, P. Krametbauer; Ponce, PR: T. Frazer, G. Veray; Portland, OR: A. Ahmann, S. LaFranchi, P. Jennings, A. Kelleher, M. Kummer, J. Hansen, M. K. Hunter, K. LaMorticella, Bergstrom, M. Rigdon; Reno, NV: K. Eckert; Renton, WA: L. J. Klaff, R. Brazg, J. Springs; Richland, WA: B. Wilson, E. Isaacson, H. Kuhn; Richmond, VA: D. Willis, P. Kaplowitz, K. Genther; Rio Piedras, PR: C. Bourdony, Jr., A. Rivera; Rochester, MN: R. Basu, R. Rizza, P. Whannel, N. Jospe, A. Utzman; Sacramento, CA: B. Sheikholisham, C. Hiner; Salt Lake City, UT: D. Hardin, R. Lindsay, M. Swinyard, M. Rallison, L. Jarrett, J. Sirstins; San Antonio, TX: K. Pierson, S. Trevino, S. Schwartz, K. Dickens; San Bernardino, CA: S. Clark, P. Scroggin, G. R. Greene; San Diego, CA: L. Linarelli, E. Camuro, S. Hermosillo, R. Estrada, W. Bailey, J. Fuqua; San Francisco, CA: S. E. Gitelman, M. Fontaine; San Juan, PR: G. Colon, L. Gonzalez de Pijem, F. Nieves-Rivera, A. Rivera, R. Perez; Santa Barbara, CA: L. Jovanovic, S. Vesterfelt; Santurce, PR: C. A. Saenz; Seattle, WA: G. Kletter, K. Pihoker, S. Kearns; Sioux Falls, SD: L. Keppen, P. Johnson, E. Krell; Skokie, IL: S. C. Duck; Spokane, WA: M. Noble, S. Thompson, K. Wilson, P. ; Springfield, IL: N. G. Soler, L. McCall; Springfield, MA: H. F. Allen, G. Roumeliotis; Springfield, MO: L. Chase, D. Braden-Moll; St. Louis, MO: N. White, L. Levandoski; St. Petersburg, FL: J. I. Malone, J. Steinbrueck; State College, PA: J. S. Ulbrecht, N. Lambert, P. Mulhall; Stony Brook, NY: T. A. Wilson, A. H. Lane, A. Smaldone; Sylmar, CA: T. Modilevsky; Syracuse, NY: R. Izquierdo, R. Weinstock, S. Mackowiak, K. Brindak; Toronto, Ontario: D. Wherrett, D. Daneman, K. Pearlman, C. McLellan, A. Rogers; Torrance, CA: E. Ipp, C. Mao; Traverse City, MI: E. H. Rushovich, I. Thorne; Tulsa, OK: D. H. Jelley, D. Greer; Vancouver, BC: D. Metzger; Washington, DC: A. Austin, A. Glasgow, J. Turek, J. Archer, G. Nunlee-BlaND: K. Johnson, J. Harris; White Plains, NY: S. Driedbart, R. Noto, A. Romano, W. Herl; Wichita, KS: R. Guthrie, O. Tatpati, A. Brenner; Willmar, MN: D. Lippert; Wilmington, DE: G. Reeves, C. Swenson; Winnipeg, Mb., L. Murphy, H. Dean, L. Berard; Winston-Salem, NC: S. S. Werbel, A. Bell-Farrow; Woodinville, WA: R. Mauseth, J. Hanson; Youngstown, OH: S. K. Mishr, L. DiCaria, B. Wilson

**Satellites:** Aberdeen, SD: C. Wischmeier; Akron, OH: M. F. Moosa, R. Levy; Albany, NY: J. Desemone; Albany, OR: L. Bentson; Alexandria, VA: H. M. Lando; Alton, IL: J. Hoelscher; Amarillo, TX: W. C. Biggs; Ames, IA: R. Carano; Anaheim, CA: P. Nostrand; Anchorage, AK: C. EsquivAl: L. Achee, J. Kelly, P. Nolan; Apple Valley, CA: T. Otsuka; Appleton, WI: K. Heyrmann; Astoria, OR: N. Autio, K. Gohl; Atherton, CA: J. Prendergast; Atlanta, GA: B. Bode, H. Delcher, C. Hamilton Reed; Atlantis, FL: M. Mellman; Augusta, GA: I. C. Herskowitz, W. Hoffman; Augusta, ME: M. Naas; Austin, TX: S. Dubois, Fehrenkamp; Aventura, FL: L. B. Chaykin; Bakersfield, CA: H. Pershadsingh, H. Shah, V. G. Ettinger; Baltimore, MD: B. J. Reiner, J. McLaughlin, P. A. Levin; Bangor, ME: A. Boniface; Bassett, NE: H. Leigh; Batavia, NY: G. Ginsberg; Bedford, OH: D. Weiss; Belleville, IL: M. Rosecan; Bellevue, WA: P. Doyle; Bellingham, WA: J. McAfee, G. Goldfogel; Bend, OR: J. Henschel; Bennington, VT: D. M. Gorson; Bethel, PA: J. Ramos; Beverly Hills, CA: M. Bush; Bismarck, ND: K. Martin; Blacksburg, VA: B. Birch; Bremerton, WA: S. Reimer; Bristol, TN: J. D. Neil; Bronx, NY: P. Saenger, J. Dimartino-Nardi; Brooklyn, NY: J. V. Capotorto, P. Sheehan, S. A. Quyyumi, N. D. Cohen; Burbank, CA: R. Stein; Burlingame, CA: D. Klonoff; Butte, MT: J. de Souza, MD: D. McCarthy, J. Salisbury, C. Edstrom; Caguas, PR: M. F. William; Caldwell, ID: M. Brown; Camp Springs, MD: R. Vigersky; Canton, OH: C. E. Smith, A. Krishna, R. Benson; Castaner, PR: F. Murphy; Cedar Rapids, IA: C. Pruchno; Chapel Hill, NC: M. Davenport; Charlottesville, VA: W. L. Clarke, M. McDuffie; Cheyenne, WY: G. Melinkovich, V. Bell; Chicago Heights, IL: A. Ravanam, W. Will; Clearwater, FL: D. Leonard; Cleveland, OH: W. Dahms; Clinton, MO: K. Scott; Columbia, SC: F. Bowyer; Columbus, GA: S. B. Leichter; Concord, CA: R. Kaplan, S. Lewis; Coopers Mills, ME: R. Miller; Corpus Cristi, TX: M. Upmanyu; Culver City, CA: N. Goldberg; Danbury, CT: R. Savino; Danville, IN: S. M. Wentworth; Danville, PA: D. R. Langdon; Davenport, IA: C. Weideman; Dayton, OH: M. Urban ; Detroit, MI: D. Transue, F. Whitehouse, J.

## SUPPLEMENTARY DATA

Cara; Downey, CA: S. Shaw; Drayton, SC: W. Price; Dubuque, IA: R. Iverson; Duluth, MN: M. Slag; Durango, CO: J. Hutt; Eau Claire, WI: N. McLean, WI: R. Moore; El Paso, TX: R. Christenson; Elgin, IL: K. Valika; Englewood, CO: N. Nayak, C. A. Bloch; Englewood, NJ: L. Strom; Escondido, CA: T. S. Bailey, C. P. Varma; Eugene, OR: D. Calder, M. Bilger; Everett, WA: K. Larson, M. Papenhausen; Fairfield, CA: Y. Shlesinger; Fargo, ND: A. Kenien; Fayetteville, NC: E. Wright; Flint, MI: M. A. Jabbar; Flushing, NY: D. L. Lorber; Fort Dodge, IA: J. Berkett; Fort Smith, AR: R. P. Robinson; Fort Wayne, IN: A. Kadambi; Framingham, MA: W. Sullivan; Fremont, CA: E. Meyer; Fresno, CA: J. L. Bautista, P. C. Norwood; Ft. Lauderdale, FL: E. Biederman, S. Nassberg, L. Goscin, M. Mata, N. Thompson, R. M. Harrell, J. Cabral; Ft. Myers, FL: A. Pietri; Ft. Worth, TX: C. R. Scott, T. K. Flannery, D. B. Wilson; Gainesville, FL: B. Rogers; Glendale, CA: M. Campos, M. N. Montero; Gorham, NH: B. Beals; Grand Junction, CO: D. Mair, A. Long; Grand Rapids, MI: R. S. Rood; Green Bay, WI: J. Taylor; Greensboro, NC: R. Sevier; Greenville, NC: G. Harris, M. A. Pfeifer; Hackensack, NJ: M. Blechman, J. Giangola; Hermitage, TN: R. Creech; Hershey, PA: M. Lathrop, A. Dunaif; Hollywood, FL: G. Miceli, L. Lewy-Alterbaum, P. S. Jellinger, S. B. Novak, K. M. Gellman, S. Lerman; Honolulu, HI: S. Waxman; Houston, TX: D. J. Hamilton; Huntington, WV: H. Driscoll; Huntsville, AL: R. Schneier; Hutchinson, KS: J. L. Casey; Indianapolis, IN: P. Boyce, J. Meachum; Irving, TX: J. Milburn; Issaquah, WA: D. Pomeroy; Jackson, MS: G. Moll; Jacksonville, FL: K. Macyko, L. A. Fox, N. Mauras; Jersey City, NJ: P. Ledereich; Juneau, AK: D. Novotney; Kalispell, MT: C. Gill, B. Rossetto; Kingston, ON, R. Houlden; Klamath Falls, OR: P. Heck; La Crosse, WI: J. Korducki; La Habra, CA: J. Winston, MD, D. Geffner; La Jolla, CA: S. Edelman, MD: B. Henry; La Mesa, CA: D. Einhorn, R. Fink, E. Gold; Lake Charles, LA: R. W. (RW) Calhoun, MD; Lake Jackson, TX: J. Leidlein; Lancaster, CA: K. Arul; Lansing, MI: D. Henry; Las Vegas, NV: D. L. Donaldson; Lebanon, OR: K. Middlestadt; Lewiston, ID: L. Grande-Luke; Lincoln, NE: J. Guest, R. Wermers, B. Bells; Little Rock, AR: P. Frindik; Livingston, NJ: G. Gewirtz; Lompoc, CA: C. Blyfeld; Long Beach, CA: M. Brakin; Los Angeles, CA: D. Borut, D. Geffner, J. Winston, M. Geffner, M. Rodriguez, V. Gura, M. Rodriguez; Los Gatos, CA: C. Shough; Louisville, KY: H. Bays, H. Shenouda; Lubbock, TX: S. Varma, M. J. Bourgeois; Lufkin, TX: L. A. Sloan; Lynchburg, VA: C.E. Guthrow, Jr.; Lynwood, CA: S. Shaw; Manhattan Beach, CA: R. Ruby; Margate, FL: B. Motzkin-Kava; Marshalltown, IA: D. Jebsen; Marshfield, WI: I. Zador, S. Maby; McLean, VA: F. Crantz; Medford, OR: D. Zietlow; Miami Beach, FL: D. Kudzma; Miami, FL: E. Levy, E.T. Shapiro, J. Jacobi, J. Pita, W. Abelove, J. Perez-Rodriguez, L. Gonzalez-Mendoza, S. Richton, P. Weissman; Middletown, NY: N. Stein; Midland, TX: L. Sherman-Adcock; Milwaukee, WI: D. Fergeson, M. Jacobson, J. Sennett, R. Jain; Minneapolis, MN: D. Etzwiler, R. C. Ramsay; Minot, ND: M. Holland; Miramar, FL: S. Carrington; Missoula, MT: S. Seagraves; Modesto, CA: G. M. Yue, J. Downs-Colby; Montebello, CA: H. Flores; Montgomery, AL: S. Weinrib; Morgantwn, WV: E. Jones; Morristown, NJ: H. Starkman; Mount Vernon, WA: D. White; Mountain View, CA: L. Doberne, M. Greenfield; Muncie, IN: K. Alexander; Napa, CA: C. O'Sullivan; Naples, FL: R. Duncan; Naranja, FL: G. Barandiaran, J. Yunis, L. Nunez, V. Ramos; Nashua, NH: E. Holland; Natrona Heights, PA: W. R. Balash; Neptune, NJ: J. Sher; New Brunswick, NJ: R. Agrin; New Orleans, LA: J. Frentz; New York, NY: I. Fennoy; Newhall, CA: S. Baron; Nipomo, CA: J. Door; Norfolk, VA: A. Vinik; North Las Vegas, NV: F. Savery; Oakland, CA: F. Gareis, R. Mack, D. Devoe, Y. Fan; Oklahoma City, OK: D. Domek; Olympia, WA: D. Kelley; Onalaska, WI: T. Roberts; O'Neill, NE: B. Gutshall; Orange, CA: I. Madu, R. Poucher; Orlando, FL: M. Mengel, P. Desrosiers, R. A. Banks, B. Kopp; Pacific Grove, CA: I. Fishman; Pacific Palisades, CA: D. Geller, W. Smith; Palm Bay, FL: J. A. Duncan; Palm Beach Gardens, FL: O. Nyman, M. Vaccarello-Cruz; Parkersburg, WV: F. L. Schwartz; Pasadena, CA: O. Olambiwonnu; Paso Robles, CA: M. Ortiz; Pembroke Pines, FL: S. Freedman; Pendleton, OR: S. Merrill; Peoria, IL: J. Wise; Philadelphia, PA: I. Rezvani, D. Doyle, P. Hale, C. Singer-Granick, W. Fore; Phoenix, AZ: A. Perelman, R. Clemmons, R. Johnsonbaugh; Pittsburgh, PA: A. R. Gonzalez;

## SUPPLEMENTARY DATA

Pocatello, ID: M. Baker, C. Field, C. Shields, K. Walker; Port Huron, MI: S. Reddy, K. Pillote; Port St. Lucie, FL: M. Borchelt; Port Townsend, WA: D. Bommer; Portland, OR: N. Curosh, D. Karl, B. Phillipson; Poway, CA: W. L. Iverson; Princeton, NJ: A. Krosnick; Providence, RI: C. B. Kahn; Puyallup, WA: B. Blodgett, N. Iverson, C. Jacobson, M. Haynes, D. Moore, R. Alston, R. Eachempati; Raleigh, NC: D. Becker; Rapid City, SD: L. Weide; Red Wing, MN: M. Decker; Redding, CA: J. Greaves; Richburg, SC: M. J. Curry; Richmond, VA: J. Radcliffe; Ridgecrest, CA: V. Schauf; Riverside, CA: D. Childs; Riverside, IL: R. Crawford, G. Charnogursky; Robbinsdale, MN: M. Stesin; Rockford, IL: M. Schneider; Rockville, MD: H. W. Rodbard, M. A. Dempsey; Roseau, MN: R. Brummer; Roseburg, OR: L. Elston, D. Marseters; Rutland, VT: P. Lapp; Sacramento, CA: N. Glaser, J. S. Soeldner; Safford, AZ: V. Chaurasia; Salem, OR: R. Michaels; Salinas, CA: A. King, R. Olson; San Antonio, TX: D. Hale, M. Danney, S. S. Miller; San Carlos, CA: S. Madan; San Diego, CA: J. R. Dudl; San Francisco, CA: N. Bohannon, M. Berlund, T. Jackson; San Jose, CA: J. Kitzmiller; Santa Rosa, CA: D. Price; Savannah, GA: K. Ehsanipoor; Sayre, PA: M. R. Homan; Scarborough, ME: J. Olshan; Scottsbluff, NE: T. Sorensen; Scranton, PA: A. PerryD; Seattle, WA: G. T. Nepom, D. McCulloch, I. Hirsch, R. Kanter, N. Niles; Shattuck, OK: M. Vogiatzi; Sheboygan, WI: V. Kerpe; Shreveport, LA: R. McVie; Sioux City, IA: J. Aniszewski, T. Carroll, R. Bacon; South Bend, IN: M. Hudson, A. Simpson; South Miami, FL: M. Fili, D. Krieger; South Windsor, CT: D. Golob; Southfield, MI: J. Carney; Springfield, IL: R. Khardori; St. Cloud, MN: M. Peitso; St. Louis, MO: J. T. Lane; St. Paul, MN: H. Katz, R. Warhol; Staten Island, NY: J. Rothman; Stockton, CA: D. F. Jensen, J. Rooke; Stoughton, MA: H. Fogel, L. Hotes; Sumter, SC: U. Lilavivat; Tacoma, WA: T. Gauthier; Tallahassee, FL: L. Deeb, T. Sherradan; Tarzana, CA: N. Lavin; Tecumseh, NE: K. Shuey, MD; Toledo, OH: J. Horner; Torrance, CA: J. M. Tsao; Traverse City, MI: A. Scrogin; Trexlertown, PA: C. Greenlee; Tucson, AZ: J. Insel, M. Wheeler; Tuscaloosa, AL: T. Kamal; Tyler, TX: L. Wiertz; Union, NJ: H. Bucholtz, J. Dunn; Urbana, IL: K. Wilson; Valhalla, NY: M. Frey, R. Noto; Ventura, CA: R. Chochinov; Vincennes, IN: J. M. Bridges; Waco, TX: M. Amar; Walnut Creek, CA: R. Weinstein, T. E. Poore; Waltham, MA: S. Brink, K. Moltz; Washington, DC: D. Sobel, G. Francis, R. Sveck, J. Ramey; Waterford, MI: N. Haque; Watseka, IL: A. Villafria, R. E. Villafria, Wausau, WI: J. Madagame; Wenatchee, WA: L. Stone; West Carrollton, OH: R. Cech; West Yellowstone, MT: J. Schnelbach; White Plains, NY: S. Dreidbart, R. Noto, T. Lebinger, L. Shane; Whittier, CA: E. Reece, R. Harris, W. D. Welsh; Wilmington, NC: P. C. Whitesides, Jr.; Winter Park, FL: A. Scoma; Woodland Hills, CA: F. H. Ziel; Worcester, MA: C. Alter, P. Lock; Yakima, WA: G. Treece

### Calculations of Risk Scores

#### ABRS (including ICA) =

$$\begin{aligned} & [0.819*(GADA\ Positivity)]+[53.433*(GADA\ Level)]+[-53.647*(GADA\ Positivity\ x\ GADA\ Level)] \\ & \quad + \\ & [-0.132*(IA-2A\ Positivity)]+[-1.005*(IA-2A\ Level)]+[2.475*(IA-2A\ Positivity\ x\ IA-2A\ Level)] \\ & \quad + \\ & [0.818*(mIAA\ Positivity)]+[108.186*(mIAA\ Level)]+[-107.559*(mIAA\ Positivity\ x\ mIAA\ Level)] \\ & \quad + \\ & [0.670*(ZnT8A\ Positivity)]+[-30.247*(ZnT8A\ Level)]+[30.187*(ZnT8A\ Positivity\ x\ ZnT8A\ Level)] \\ & \quad + \\ & [0.167*(ICA\ Positivity)]+[-0.024*(ICA\ Level)]+[0.024*(ICA\ Positivity\ x\ ICA\ Level)] \end{aligned}$$



## SUPPLEMENTARY DATA

### **ABRS (excluding ICA) =**

$$\begin{aligned} & [0.837*(\text{GADA Positivity})]+[53.244*(\text{GADA Level})]+[-53.396*(\text{GADA Positivity} \times \text{GADA Level})] \\ & \quad + \\ & [-0.139*(\text{IA-2A Positivity})]+[-0.433*(\text{IA-2A Level})]+[1.982*(\text{IA-2A Positivity} \times \text{IA-2A Level})] \\ & \quad + \\ & [0.840*(\text{mIAA Positivity})]+[113.151*(\text{mIAA Level})]+[-112.496*(\text{mIAA Positivity} \times \text{mIAA Level})] \\ & \quad + \\ & [0.711*(\text{ZnT8A Positivity})]+[-32.821*(\text{ZnT8A Level})]+[32.817*(\text{ZnT8A Positivity} \times \text{ZnT8A Level})] \end{aligned}$$

### **DPTRS =**

$$\begin{aligned} & +1.569*[\log\text{-BMI (kg/m}^2)] \\ & -0.056*[\text{Age (years)}] \\ & +0.813*[\text{Total Glucose (mg/dl)/100}] \\ & +0.476*[\log\text{-Fasting C-peptide (ng/ml)}] \\ & -0.848*[\text{Total C-peptide (ng/ml)/10}] \\ & (\text{Totals do not include fasting values.}) \end{aligned}$$

$$\text{Combined Risk Score (including ICA)} = [0.906*(\text{DPTRS})]+[0.569*(\text{ABRS})]$$

$$\text{Combined Risk Score (excluding ICA)} = [0.906*(\text{DPTRS})]+[0.571*(\text{ABRS})]$$

### **Conversion of Risk Scores to Risk Estimates**

The risk scores can be converted to risk estimates of T1D by the following equation.

$$\text{Risk} = 1 - (\text{proportion without disease over the defined period})^{\exp(\text{risk score} - \text{mean risk score of cohort})}$$

The equations for the 3-year risk calculations of the autoantibody risk scores and an example are shown below.

#### **ABRS (including ICA)**

Mean Risk Score = 1.52

Proportion without disease at 3 years = 0.83

$$\text{Risk} = 1 - (0.83)^{\exp(\text{risk score} - 1.52)}$$

#### **ABRS (excluding ICA)**

Mean risk score = 1.53

Proportion without disease at 3 years = 0.83

$$\text{Risk} = 1 - (0.83)^{\exp(\text{risk score} - 1.53)}$$

#### **Combined Risk Score (including ICA)**

Mean risk score = 6.45

Proportion without disease at 3 years = 0.83

$$\text{Risk} = 1 - (0.83)^{\exp(\text{risk score} - 6.45)}$$

#### **Combined Risk Score (excluding ICA)**

Mean risk score = 6.46

Proportion without disease at 3 years = 0.83

$$\text{Risk} = 1 - (0.83)^{\exp(\text{risk score} - 6.46)}$$

SUPPLEMENTARY DATA

**Example:** An individual with a calculated (see above) ABRS (including ICA) value of 2.00:

$$\text{Risk at 3 Years} = 1 - (0.83)^{\exp(2.00 - 1.52)} = 0.26$$

An individual with an ABRS (including ICA) value of 3.00:

$$\text{Risk at 3 Years} = 1 - (0.83)^{\exp(3.00 - 1.52)} = 0.56$$

**Supplementary Table 1.** Autoantibody levels of outliers excluded from analyses along with ranges of values after exclusion

|                | Outlier Level | Range without Outlier |
|----------------|---------------|-----------------------|
| MIAA Positives | 2.47          | 0.011 to 0.838        |
| MIAA Negatives | -0.023        | -0.010 to 0.010       |
| GADA Negatives | -0.077        | -0.034 to 0.029       |
| ICA Positives  | 10,240        | 10 to 2,560           |

**Supplementary Table 2.** Frequencies of negativity and positivity, and levels\*\* of autoantibodies for the 784 TrialNet participants studied

|       | Negative  |             | Positive  |             |
|-------|-----------|-------------|-----------|-------------|
|       | Total     | Levels      | Total     | Levels      |
| IA-2A | 512 (65%) | 0.005±0.13  | 272 (35%) | 0.340±0.322 |
| GAD65 | 180 (23%) | 0.005±0.013 | 604 (77%) | 0.564±0.331 |
| mIAA  | 463 (59%) | 0.001±0.003 | 321 (41%) | 0.053±0.082 |
| ZnT8A | 523 (67%) | 0.002±0.006 | 261 (33%) | 0.314±0.241 |
| ICA*  | 505 (64%) | 0           | 179 (36%) | 80 (20,160) |

\*Levels did not vary in the negative range for ICA.

\*\*Mean±SD levels are shown with the exception of ICA for which median and quartile boundaries are shown.

**Supplementary Table 3.** Values (mean±SD) of the DPTRS components for the 704 TrialNet participants studied

| DPTRS Components      | Values                  |
|-----------------------|-------------------------|
| Age (Years)           | 18.96±13.60             |
| Log BMI               | 3.05±0.28 (22.00±6.63)* |
| Log Fasting C-peptide | 0.30±0.52 (1.54±0.79)*  |
| C-peptide Sum/10      | 2.40±0.96               |
| Glucose Sum/100       | 5.32±1.07               |

\*Actual values are shown in parentheses
